# Supplementary material for: Radical Scavenging Activity and Pharmacokinetic Properties of Coumarin–Hydroxybenzohydrazide Hybrids
Source: MDPI journal article supplement (doi:10.3390/ijms23010490), 2022-01-01
Supplement: s1 [file s1]

### *Supplementary Material*

## **Radical scavenging activity and pharmacokinetic properties of coumarin-hydroxybenzohydrazide hybrids**

Marko R. Antonijević<sup>1,2</sup>, Edina H. Avdović<sup>1</sup>, Dušica M. Simijonović<sup>1</sup>, Žiko Milanović<sup>1</sup>, Ana Amić<sup>3</sup>, Zoran S. Marković<sup>1\*</sup>

<sup>1</sup>*University of Kragujevac, Institute for Information Technologies, Department of Science, Jovana Cvijića bb, 34000 Kragujevac, Serbia*

<sup>2</sup>*University of Kragujevac, Faculty of Science, Department of Chemistry, Radoja Domanovića 12, 34000 Kragujevac, Serbia*

<sup>3</sup>*Department of Chemistry, Josip Juraj Strossmayer University of Osijek, Ulica cara Hadrijana 8A, 31000 Osijek, Croatia; aamic@kemija.unios.hr*

*\*Correspondence: e-mail address: zmarkovic@uni.kg.ac.rs ; phone number: +38134/610-01-95*

**Table S1:** Thermodynamic parameters for radical scavenging activity of investigated compounds with alkoxy radicals (kJ mol<sup>-1</sup>).

| With<br>alkoxy<br>radicals          |                     | HAT                | SET-PT             |                   | SPLET              |                   | HAT                | SET-PT             |                   | SPLET              |                   |
|-------------------------------------|---------------------|--------------------|--------------------|-------------------|--------------------|-------------------|--------------------|--------------------|-------------------|--------------------|-------------------|
|                                     |                     | $\Delta_r G_{HAT}$ | $\Delta_r G_{SET}$ | $\Delta_r G_{PT}$ | $\Delta_r G_{SPL}$ | $\Delta_r G_{ET}$ | $\Delta_r G_{HAT}$ | $\Delta_r G_{SET}$ | $\Delta_r G_{PT}$ | $\Delta_r G_{SPL}$ | $\Delta_r G_{ET}$ |
|                                     |                     | Water              |                    |                   |                    |                   | Benzene            |                    |                   |                    |                   |
| •OCH <sub>3</sub>                   |                     |                    |                    |                   |                    |                   |                    |                    |                   |                    |                   |
| 3a                                  | C7 <sup>•</sup> -NH | -81                | 225                | -307              | -166               | 85                | -86                | 417                | -504              | -229               | 143               |
|                                     | C2 <sup>•</sup> -OH | -44                |                    | -270              | -92                | 48                | -32                |                    | -450              | -133               | 101               |
| 3b                                  | C7 <sup>•</sup> -NH | -80                | 214                | -294              | -146               | 66                | -86                | 403                | -489              | -204               | 118               |
|                                     | C4 <sup>•</sup> -OH | -53                |                    | -267              | -118               | 64                | -51                |                    | -454              | -171               | 120               |
| 3c                                  | C7 <sup>•</sup> -NH | -81                | 219                | -278              | -143               | 64                | -86                | 402                | -488              | -203               | 117               |
|                                     | C4 <sup>•</sup> -OH | -61                |                    | -280              | -101               | 39                | -57                |                    | -459              | -157               | 100               |
| 3d                                  | C7 <sup>•</sup> -NH | -79                | 180                | -259              | -168               | 89                | -83                | 424                | -506              | -233               | 150               |
|                                     | C2 <sup>•</sup> -OH | -75                |                    | -256              | -110               | 35                | -60                |                    | -484              | -157               | 97                |
|                                     | C3 <sup>•</sup> -OH | -73                |                    | -253              | -103               | 30                | -58                |                    | -482              | -146               | 88                |
| 3e                                  | C7 <sup>•</sup> -NH | -76                | 200                | -277              | -145               | 68                | -84                | 418                | -502              | -206               | 122               |
|                                     | C3 <sup>•</sup> -OH | -85                |                    | -285              | -119               | 35                | -86                |                    | -504              | -179               | 93                |
|                                     | C4 <sup>•</sup> -OH | -83                |                    | -283              | -129               | 46                | -84                |                    | -503              | -192               | 107               |
| •OCH <sub>2</sub> CH <sub>3</sub>   |                     |                    |                    |                   |                    |                   |                    |                    |                   |                    |                   |
| 3a                                  | C7 <sup>•</sup> -NH | -79                | 228                | -307              | -166               | 87                | -83                | 415                | -498              | -224               | 140               |
|                                     | C2 <sup>•</sup> -OH | -41                |                    | -269              | -92                | 50                | -29                |                    | -444              | -127               | 98                |
| 3b                                  | C7 <sup>•</sup> -NH | -77                | 217                | -294              | -145               | 68                | -83                | 400                | -483              | -198               | 115               |
|                                     | C4 <sup>•</sup> -OH | -51                |                    | -267              | -118               | 67                | -48                |                    | -448              | -166               | 117               |
| 3c                                  | C7 <sup>•</sup> -NH | -78                | 221                | -278              | -142               | 67                | -83                | 400                | -483              | -197               | 114               |
|                                     | C4 <sup>•</sup> -OH | -59                |                    | -280              | -100               | 42                | -54                |                    | -453              | -151               | 97                |
| 3d                                  | C7 <sup>•</sup> -NH | -76                | 183                | -259              | -168               | 92                | -80                | 421                | -501              | -227               | 148               |
|                                     | C2 <sup>•</sup> -OH | -73                |                    | -256              | -110               | 38                | -57                |                    | -478              | -152               | 94                |
|                                     | C3 <sup>•</sup> -OH | -70                |                    | -253              | -102               | 32                | -55                |                    | -476              | -141               | 86                |
| 3e                                  | C7 <sup>•</sup> -NH | -74                | 203                | -277              | -145               | 71                | -81                | 416                | -497              | -200               | 119               |
|                                     | C3 <sup>•</sup> -OH | -82                |                    | -285              | -119               | 37                | -83                |                    | -499              | -173               | 90                |
|                                     | C4 <sup>•</sup> -OH | -80                |                    | -283              | -128               | 48                | -81                |                    | -497              | -186               | 105               |
| •OCH(CH <sub>3</sub> ) <sub>2</sub> |                     |                    |                    |                   |                    |                   |                    |                    |                   |                    |                   |
| 3a                                  | C7 <sup>•</sup> -NH | -85                | 222                | -307              | -166               | 81                | -90                | 405                | -495              | -221               | 130               |
|                                     | C2 <sup>•</sup> -OH | -48                |                    | -270              | -92                | 44                | -36                |                    | -441              | -124               | 88                |
| 3b                                  | C7 <sup>•</sup> -NH | -83                | 211                | -294              | -146               | 62                | -90                | 390                | -480              | -195               | 105               |
|                                     | C4 <sup>•</sup> -OH | -57                |                    | -268              | -118               | 61                | -55                |                    | -445              | -163               | 108               |
| 3c                                  | C7 <sup>•</sup> -NH | -85                | 215                | -278              | -143               | 61                | -90                | 390                | -480              | -194               | 104               |
|                                     | C4 <sup>•</sup> -OH | -65                |                    | -280              | -101               | 36                | 16                 |                    | -450              | -148               | 88                |
| 3d                                  | C7 <sup>•</sup> -NH | -82                | 177                | -259              | -168               | 86                | -87                | 411                | -498              | -225               | 138               |
|                                     | C2 <sup>•</sup> -OH | -79                |                    | -256              | -111               | 32                | -64                |                    | -475              | -149               | 85                |
|                                     | C3 <sup>•</sup> -OH | -76                |                    | -253              | -103               | 26                | -62                |                    | -473              | -138               | 76                |
| 3e                                  | C7 <sup>•</sup> -NH | -80                | 197                | -277              | -145               | 65                | -88                | 406                | -494              | -197               | 109               |
|                                     | C3 <sup>•</sup> -OH | -88                |                    | -285              | -119               | 31                | -90                |                    | -496              | -171               | 81                |
|                                     | C4 <sup>•</sup> -OH | -87                |                    | -284              | -129               | 42                | -88                |                    | -494              | -183               | 95                |
| •OC(CH <sub>3</sub> ) <sub>3</sub>  |                     |                    |                    |                   |                    |                   |                    |                    |                   |                    |                   |
| 3a                                  | C7 <sup>•</sup> -NH | -90                | 221                | -311              | -170               | 81                | -95                | 401                | -496              | -221               | 126               |
|                                     | C2 <sup>•</sup> -OH | -52                |                    | -274              | -96                | 44                | -41                |                    | -442              | -125               | 85                |
| 3b                                  | C7 <sup>•</sup> -NH | -88                | 210                | -298              | -150               | 62                | -94                | 386                | -481              | -196               | 102               |
|                                     | C4 <sup>•</sup> -OH | -61                |                    | -272              | -122               | 61                | -60                |                    | -446              | -163               | 104               |
| 3c                                  | C7 <sup>•</sup> -NH | -89                | 215                | -282              | -147               | 60                | -95                | 386                | -481              | -195               | 101               |
|                                     | C4 <sup>•</sup> -OH | -69                |                    | -284              | -105               | 35                | -65                |                    | -451              | -149               | 84                |
| 3d                                  | C7 <sup>•</sup> -NH | -87                | 177                | -263              | -172               | 86                | -91                | 407                | -499              | -225               | 134               |
|                                     | C2 <sup>•</sup> -OH | -83                |                    | -260              | -115               | 31                | -69                |                    | -476              | -150               | 81                |
|                                     | C3 <sup>•</sup> -OH | -81                |                    | -257              | -107               | 26                | -67                |                    | -474              | -138               | 72                |
| 3e                                  | C7 <sup>•</sup> -NH | -84                | 197                | -281              | -149               | 65                | -93                | 402                | -494              | -198               | 105               |
|                                     | C3 <sup>•</sup> -OH | -93                |                    | -289              | -123               | 31                | -94                |                    | -496              | -171               | 77                |
|                                     | C4 <sup>•</sup> -OH | -91                |                    | -288              | -133               | 42                | -93                |                    | -495              | -184               | 91                |

**Table S2:** Thermodynamic parameters for radical scavenging activity of investigated compounds with peroxy radicals (kJ mol<sup>-1</sup>).

| With<br>peroxy<br>radicals         |                     | HAT                | SET-PT             |                   | SPLET              |                   | HAT                | SET-PT             |                   | SPLET              |                   |
|------------------------------------|---------------------|--------------------|--------------------|-------------------|--------------------|-------------------|--------------------|--------------------|-------------------|--------------------|-------------------|
|                                    |                     | $\Delta_r G_{HAT}$ | $\Delta_r G_{SET}$ | $\Delta_r G_{PT}$ | $\Delta_r G_{SPL}$ | $\Delta_r G_{ET}$ | $\Delta_r G_{HAT}$ | $\Delta_r G_{SET}$ | $\Delta_r G_{PT}$ | $\Delta_r G_{SPL}$ | $\Delta_r G_{ET}$ |
|                                    |                     | Water              |                    |                   |                    |                   |                    | Benzene            |                   |                    |                   |
| •OOCH <sub>3</sub>                 |                     |                    |                    |                   |                    |                   |                    |                    |                   |                    |                   |
| 3a                                 | C7 <sup>•</sup> -NH | -1                 | 261                | -262              | -122               | 120               | -7                 | 439                | -461              | -186               | 179               |
|                                    | C2 <sup>•</sup> -OH | 36                 |                    | -225              | -47                | 83                | 48                 |                    | -406              | -90                | 137               |
| 3b                                 | C7 <sup>•</sup> -NH | 1                  | 250                | -249              | -101               | 101               | -6                 | 439                | -445              | -161               | 154               |
|                                    | C4 <sup>•</sup> -OH | 27                 |                    | -223              | -73                | 100               | 29                 |                    | -411              | -128               | 156               |
| 3c                                 | C7 <sup>•</sup> -NH | -1                 | 255                | -234              | -98                | 98                | -6                 | 451                | -445              | -160               | 153               |
|                                    | C4 <sup>•</sup> -OH | 19                 |                    | -236              | -56                | 75                | 16                 |                    | -416              | -114               | 137               |
| 3d                                 | C7 <sup>•</sup> -NH | 2                  | 216                | -214              | -124               | 125               | -3                 | 460                | -463              | -190               | 187               |
|                                    | C2 <sup>•</sup> -OH | 5                  |                    | -211              | -66                | 71                | 19                 |                    | -441              | -114               | 133               |
|                                    | C3 <sup>•</sup> -OH | 8                  |                    | -209              | -58                | 65                | 22                 |                    | -438              | -103               | 125               |
| 3e                                 | C7 <sup>•</sup> -NH | 4                  | 236                | -232              | -100               | 104               | -4                 | 455                | -459              | -162               | 158               |
|                                    | C3 <sup>•</sup> -OH | -4                 |                    | -240              | -75                | 70                | -6                 |                    | -461              | -136               | 130               |
|                                    | C4 <sup>•</sup> -OH | -3                 |                    | -239              | -84                | 81                | -5                 |                    | -459              | -149               | 144               |
| •OOCH <sub>2</sub> CH <sub>3</sub> |                     |                    |                    |                   |                    |                   |                    |                    |                   |                    |                   |
| 3a                                 | C7 <sup>•</sup> -NH | -2                 | 266                | -267              | -127               | 125               | -6                 | 456                | -462              | -187               | 181               |
|                                    | C2 <sup>•</sup> -OH | 36                 |                    | -230              | -52                | 88                | 48                 |                    | -408              | -91                | 139               |
| 3b                                 | C7 <sup>•</sup> -NH | 0                  | 254                | -254              | -106               | 106               | -5                 | 441                | -447              | -162               | 156               |
|                                    | C4 <sup>•</sup> -OH | 27                 |                    | -228              | -78                | 105               | 29                 |                    | -412              | -129               | 159               |
| 3c                                 | C7 <sup>•</sup> -NH | -1                 | 259                | -239              | -103               | 104               | -6                 | 441                | -446              | -161               | 155               |
|                                    | C4 <sup>•</sup> -OH | 18                 |                    | -241              | -61                | 79                | 24                 |                    | -417              | -115               | 139               |
| 3d                                 | C7 <sup>•</sup> -NH | 1                  | 221                | -220              | -129               | 130               | -2                 | 462                | -460              | -191               | 189               |
|                                    | C2 <sup>•</sup> -OH | 5                  |                    | -216              | -71                | 75                | 20                 |                    | -462              | -115               | 136               |
|                                    | C3 <sup>•</sup> -OH | 7                  |                    | -214              | -63                | 70                | 22                 |                    | -461              | -104               | 127               |
| 3e                                 | C7 <sup>•</sup> -NH | 4                  | 241                | -237              | -105               | 109               | -4                 | 457                | -464              | -164               | 160               |
|                                    | C3 <sup>•</sup> -OH | -5                 |                    | -245              | -80                | 75                | -5                 |                    | -442              | -137               | 132               |
|                                    | C4 <sup>•</sup> -OH | -3                 |                    | -244              | -89                | 86                | -4                 |                    | -440              | -150               | 146               |
| •OOCH=CH <sub>2</sub>              |                     |                    |                    |                   |                    |                   |                    |                    |                   |                    |                   |
| 3a                                 | C7 <sup>•</sup> -NH | -16                | 216                | -232              | -92                | 75                | -20                | 399                | -419              | -144               | 124               |
|                                    | C2 <sup>•</sup> -OH | 21                 |                    | -195              | -17                | 38                | 34                 |                    | -365              | -48                | 82                |
| 3b                                 | C7 <sup>•</sup> -NH | -15                | 204                | -219              | -71                | 56                | -20                | 384                | -404              | -119               | 101               |
|                                    | C4 <sup>•</sup> -OH | 12                 |                    | -193              | -43                | 55                | 15                 |                    | -369              | -86                | 99                |
| 3c                                 | C7 <sup>•</sup> -NH | -16                | 209                | -233              | -68                | 54                | -20                | 383                | -403              | -118               | 98                |
|                                    | C4 <sup>•</sup> -OH | 4                  |                    | -206              | -26                | 30                | 9                  |                    | -374              | -72                | 81                |
| 3d                                 | C7 <sup>•</sup> -NH | -14                | 171                | -185              | -94                | 80                | -17                | 405                | -421              | -148               | 131               |
|                                    | C2 <sup>•</sup> -OH | -10                |                    | -181              | -36                | 26                | 6                  |                    | -399              | -72                | 78                |
|                                    | C3 <sup>•</sup> -OH | -8                 |                    | -179              | -28                | 20                | 8                  |                    | -397              | -61                | 69                |
| 3e                                 | C7 <sup>•</sup> -NH | -11                | 191                | -202              | -70                | 59                | -18                | 399                | -417              | -121               | 103               |
|                                    | C3 <sup>•</sup> -OH | -20                |                    | -210              | -45                | 25                | -20                |                    | -419              | -94                | 74                |
|                                    | C4 <sup>•</sup> -OH | -18                |                    | -209              | -54                | 36                | -18                |                    | -418              | -107               | 89                |

**Table S3:** Thermodynamic parameters for radical scavenging activity of investigated compounds with chlorinated methyl-peroxy radicals (kJ mol<sup>-1</sup>).

| With chlorinated<br>Me-peroxy<br>radicals |                     | HAT                | SET-PT             |                   | SPLET              |                   | HAT                | SET-PT             |                   | SPLET              |                   |
|-------------------------------------------|---------------------|--------------------|--------------------|-------------------|--------------------|-------------------|--------------------|--------------------|-------------------|--------------------|-------------------|
|                                           |                     | $\Delta_r G_{HAT}$ | $\Delta_r G_{SET}$ | $\Delta_r G_{PT}$ | $\Delta_r G_{SPL}$ | $\Delta_r G_{ET}$ | $\Delta_r G_{HAT}$ | $\Delta_r G_{SET}$ | $\Delta_r G_{PT}$ | $\Delta_r G_{SPL}$ | $\Delta_r G_{ET}$ |
|                                           |                     | Water              |                    |                   |                    |                   | Benzene            |                    |                   |                    |                   |
| ClCH <sub>2</sub> OO•                     |                     |                    |                    |                   |                    |                   |                    |                    |                   |                    |                   |
| 3a                                        | C7 <sup>•</sup> -NH | -26                | 198                | -224              | -83                | 58                | -31                | 374                | -405              | -131               | 99                |
|                                           | C2 <sup>•</sup> -OH | 12                 |                    | -187              | -9                 | 21                | 23                 |                    | -351              | -34                | 58                |
| 3b                                        | C7 <sup>•</sup> -NH | -24                | 187                | -211              | -63                | 38                | -31                | 359                | -390              | -105               | 75                |
|                                           | C4 <sup>•</sup> -OH | 2                  |                    | -184              | -35                | 37                | 4                  |                    | -355              | -73                | 77                |
| 3c                                        | C7 <sup>•</sup> -NH | -25                | 192                | -195              | -60                | 35                | -31                | 359                | -390              | -104               | 74                |
|                                           | C4 <sup>•</sup> -OH | -6                 |                    | -197              | -18                | 12                | -1                 |                    | -360              | -58                | 57                |
| 3d                                        | C7 <sup>•</sup> -NH | -23                | 153                | -176              | -85                | 62                | -28                | 380                | -408              | -135               | 107               |
|                                           | C2 <sup>•</sup> -OH | -20                |                    | -173              | -27                | 8                 | -5                 |                    | -385              | -59                | 54                |
|                                           | C3 <sup>•</sup> -OH | -17                |                    | -170              | -20                | 3                 | -3                 |                    | -383              | -48                | 45                |
| 3e                                        | C7 <sup>•</sup> -NH | -21                | 173                | -194              | -62                | 41                | -29                | 375                | -404              | -107               | 78                |
|                                           | C3 <sup>•</sup> -OH | -29                |                    | -202              | -36                | 8                 | -31                |                    | -406              | -81                | 50                |
|                                           | C4 <sup>•</sup> -OH | -27                |                    | -200              | -45                | 18                | -29                |                    | -404              | -93                | 64                |
| Cl <sub>2</sub> CHOO•                     |                     |                    |                    |                   |                    |                   |                    |                    |                   |                    |                   |
| 3a                                        | C7 <sup>•</sup> -NH | -35                | 169                | -204              | -63                | 28                | -39                | 343                | -381              | -106               | 68                |
|                                           | C2 <sup>•</sup> -OH | 2                  |                    | -166              | 11                 | -9                | 16                 |                    | -327              | -10                | 26                |
| 3b                                        | C7 <sup>•</sup> -NH | -33                | 157                | -191              | -42                | 9                 | -38                | 328                | -366              | -81                | 43                |
|                                           | C4 <sup>•</sup> -OH | -7                 |                    | -164              | -15                | 8                 | -3                 |                    | -331              | -48                | 45                |
| 3c                                        | C7 <sup>•</sup> -NH | -34                | 162                | -175              | -39                | 5                 | -38                | 327                | -366              | -80                | 42                |
|                                           | C4 <sup>•</sup> -OH | -15                |                    | -177              | 3                  | -17               | -9                 |                    | -336              | -34                | 25                |
| 3d                                        | C7 <sup>•</sup> -NH | -32                | 124                | -156              | -65                | 33                | -35                | 349                | -384              | -110               | 75                |
|                                           | C2 <sup>•</sup> -OH | -29                |                    | -153              | -7                 | -21               | -12                |                    | -361              | -35                | 22                |
|                                           | C3 <sup>•</sup> -OH | -26                |                    | -150              | -1                 | -27               | -10                |                    | -359              | -24                | 13                |
| 3e                                        | C7 <sup>•</sup> -NH | -30                | 144                | -174              | -42                | 12                | -36                | 343                | -380              | -83                | 47                |
|                                           | C3 <sup>•</sup> -OH | -38                |                    | -182              | -16                | -22               | -38                |                    | -382              | -56                | 18                |
|                                           | C4 <sup>•</sup> -OH | -36                |                    | -180              | -25                | -11               | -36                |                    | -380              | -69                | 33                |
| Cl <sub>3</sub> COO•                      |                     |                    |                    |                   |                    |                   |                    |                    |                   |                    |                   |
| 3a                                        | C7 <sup>•</sup> -NH | -38                | 147                | -185              | -44                | 7                 | -41                | 315                | -356              | -81                | 40                |
|                                           | C2 <sup>•</sup> -OH | -1                 |                    | -148              | 30                 | -31               | 47                 |                    | -301              | 15                 | -2                |
| 3b                                        | C7 <sup>•</sup> -NH | -36                | 136                | -172              | -23                | -13               | -40                | 300                | -340              | -55                | 15                |
|                                           | C4 <sup>•</sup> -OH | -10                |                    | -145              | 4                  | -14               | -5                 |                    | -305              | -23                | 18                |
| 3c                                        | C7 <sup>•</sup> -NH | -37                | 141                | -178              | -21                | -16               | -40                | 300                | -340              | -55                | 14                |
|                                           | C4 <sup>•</sup> -OH | -18                |                    | -158              | 21                 | -39               | -11                |                    | -311              | -9                 | -2                |
| 3d                                        | C7 <sup>•</sup> -NH | -35                | 102                | -137              | -46                | 11                | -37                | 300                | -358              | -85                | 48                |
|                                           | C2 <sup>•</sup> -OH | -32                |                    | -134              | 12                 | -43               | -15                |                    | -336              | -9                 | -5                |
|                                           | C3 <sup>•</sup> -OH | -29                |                    | -131              | 19                 | -49               | -12                |                    | -333              | 2                  | -14               |
| 3e                                        | C7 <sup>•</sup> -NH | -33                | 122                | -155              | -23                | -10               | -40                | 316                | -354              | -57                | 19                |
|                                           | C3 <sup>•</sup> -OH | -41                |                    | -163              | 3                  | -44               | -39                |                    | -356              | -31                | -9                |
|                                           | C4 <sup>•</sup> -OH | -39                |                    | -161              | -6                 | -33               | -38                |                    | -354              | -43                | 5                 |

**Table S4:** Thermodynamic parameters for RAF mechanistic pathway of inactivation of  $\text{CH}_3\text{O}^\bullet$  by investigated compounds ( $\text{kJ mol}^{-1}$ ).

| $\text{CH}_3\text{O}^\bullet$ | Compound  | Position | Water | Benzene |
|-------------------------------|-----------|----------|-------|---------|
|                               | <b>3a</b> | C5''     | 25.4  | 23.0    |
|                               |           | C6''     | -1.5  | 0.4     |
|                               |           | C7       | 17.9  | 15.5    |
|                               | <b>3b</b> | C5''     | 19.3  | 16.9    |
|                               |           | C6''     | 18.9  | 11.7    |
|                               |           | C7       | 17.7  | 12.0    |
|                               | <b>3c</b> | C5''     | 28.5  | 24.7    |
|                               |           | C6''     | 6.0   | 0.6     |
|                               |           | C7       | 20.6  | 17.5    |
|                               | <b>3d</b> | C5''     | 27.1  | 25.3    |
|                               |           | C6''     | -9.3  | -13.8   |
|                               |           | C7       | 20.5  | 16.1    |
|                               | <b>3e</b> | C5''     | 26.7  | 23.8    |
|                               |           | C6''     | 6.9   | 2.9     |
|                               |           | C7       | 17.9  | 14.0    |

**Table S5:** Thermodynamic parameters for RAF mechanistic pathway of inactivation of  $\text{CH}_3\text{CH}_2\text{O}^\bullet$  by investigated compounds ( $\text{kJ mol}^{-1}$ ).

| $\text{CH}_3\text{CH}_2\text{O}^\bullet$ | Compound  | Position | Water | Benzene |
|------------------------------------------|-----------|----------|-------|---------|
|                                          | <b>3a</b> | C5''     | 30.1  | 28.4    |
|                                          |           | C6''     | 11.2  | 5.3     |
|                                          |           | C7       | 21.1  | 19.9    |
|                                          | <b>3b</b> | C5''     | 23.4  | 21.6    |
|                                          |           | C6''     | 23.0  | 16.7    |
|                                          |           | C7       | 22.2  | 17.3    |
|                                          | <b>3c</b> | C5''     | 36.2  | 30.0    |
|                                          |           | C6''     | 15.0  | 4.7     |
|                                          |           | C7       | 24.9  | 24.9    |
|                                          | <b>3d</b> | C5''     | 35.7  | 29.8    |
|                                          |           | C6''     | -5.0  | -10.4   |
|                                          |           | C7       | 22.6  | 21.5    |
|                                          | <b>3e</b> | C5''     | 33.8  | 29.4    |
|                                          |           | C6''     | 13.8  | 1.3     |
|                                          |           | C7       | 27.2  | 21.3    |

**Table S6:** Thermodynamic parameters for RAF mechanistic pathway of inactivation of  $(\text{CH}_3)_2\text{CHO}^\bullet$  by investigated compounds ( $\text{kJ mol}^{-1}$ ).

| $(\text{CH}_3)_2\text{CHO}^\bullet$ | Compound  | Position | Water | Benzene |
|-------------------------------------|-----------|----------|-------|---------|
|                                     | <b>3a</b> | C5''     | 33.0  | 29.4    |
|                                     |           | C6''     | 6.7   | 2.4     |
|                                     |           | C7       | 23.8  | 16.8    |
|                                     | <b>3b</b> | C5''     | 19.5  | 18.1    |
|                                     |           | C6''     | 23.1  | 16.0    |
|                                     |           | C7       | 17.3  | 13.2    |
|                                     | <b>3c</b> | C5''     | 35.3  | 28.9    |
|                                     |           | C6''     | 12.4  | 6.8     |
|                                     |           | C7       | 23.0  | 16.6    |
|                                     | <b>3d</b> | C5''     | 37.6  | 33.1    |
|                                     |           | C6''     | -6.8  | -10.8   |
|                                     |           | C7       | 25.4  | 19.1    |
|                                     | <b>3e</b> | C5''     | 27.4  | 27.3    |
|                                     |           | C6''     | 12.1  | 0.8     |
|                                     |           | C7       | 21.8  | 18.2    |

**Table S7:** Thermodynamic parameters for RAF mechanistic pathway of inactivation of  $(\text{CH}_3)_3\text{CO}^\bullet$  by investigated compounds ( $\text{kJ mol}^{-1}$ ).

| $(\text{CH}_3)_3\text{CO}^\bullet$ | Compound  | Position | Water | Benzene |
|------------------------------------|-----------|----------|-------|---------|
|                                    | <b>3a</b> | C5''     | 30.8  | 26.1    |
|                                    |           | C6''     | 17.6  | 13.3    |
|                                    |           | C7       | 35.7  | 39.8    |
|                                    | <b>3b</b> | C5''     | 38.0  | 32.6    |
|                                    |           | C6''     | 33.0  | 26.1    |
|                                    |           | C7       | 32.8  | 30.7    |
|                                    | <b>3c</b> | C5''     | 47.8  | 36.4    |
|                                    |           | C6''     | 23.4  | 16.4    |
|                                    |           | C7       | 43.9  | 39.3    |
|                                    | <b>3d</b> | C5''     | 49.5  | 44.9    |
|                                    |           | C6''     | 2.4   | -0.1    |
|                                    |           | C7       | 35.5  | 38.0    |
|                                    | <b>3e</b> | C5''     | 44.7  | 42.6    |
|                                    |           | C6''     | 16.9  | 18.1    |
|                                    |           | C7       | 41.4  | 37.2    |

**Table S8:** Thermodynamic parameters for RAF mechanistic pathway of inactivation of  $\text{CH}_3\text{COO}^\bullet$  by investigated compounds ( $\text{kJ mol}^{-1}$ ).

| $\text{CH}_3\text{OO}^\bullet$ | Compound  | Position | Water | Benzene |
|--------------------------------|-----------|----------|-------|---------|
|                                | <b>3a</b> | C5''     | 95.7  | 87.4    |
|                                |           | C6''     | 73.4  | 67.5    |
|                                |           | C7       | 89.0  | 85.7    |
|                                | <b>3b</b> | C5''     | 85.0  | 85.6    |
|                                |           | C6''     | 91.2  | 83.3    |
|                                |           | C7       | 86.2  | 84.3    |
|                                | <b>3c</b> | C5''     | 99.9  | 93.5    |
|                                |           | C6''     | 59.2  | 68.1    |
|                                |           | C7       | 89.7  | 90.7    |
|                                | <b>3d</b> | C5''     | 98.0  | 94.2    |
|                                |           | C6''     | 59.2  | 53.6    |
|                                |           | C7       | 89.7  | 89.8    |
|                                | <b>3e</b> | C5''     | 104.5 | 97.0    |
|                                |           | C6''     | 80.8  | 75.0    |
|                                |           | C7       | 95.2  | 91.2    |

**Table S9:** Thermodynamic parameters for RAF mechanistic pathway of inactivation of  $\text{CH}_3\text{CH}_2\text{OO}^\bullet$  by investigated compounds ( $\text{kJ mol}^{-1}$ ).

| $\text{CH}_3\text{CH}_2\text{OO}^\bullet$ | Compound  | Position | Water | Benzene |
|-------------------------------------------|-----------|----------|-------|---------|
|                                           | <b>3a</b> | C5''     | 91.0  | 85.9    |
|                                           |           | C6''     | 72.6  | 62.6    |
|                                           |           | C7       | 91.8  | 90.1    |
|                                           | <b>3b</b> | C5''     | 92.6  | 88.8    |
|                                           |           | C6''     | 90.3  | 82.1    |
|                                           |           | C7       | 91.7  | 88.1    |
|                                           | <b>3c</b> | C5''     | 85.4  | 80.3    |
|                                           |           | C6''     | 79.5  | 71.5    |
|                                           |           | C7       | 96.2  | 92.6    |
|                                           | <b>3d</b> | C5''     | 94.0  | 92.1    |
|                                           |           | C6''     | 62.6  | 51.6    |
|                                           |           | C7       | 92.0  | 92.1    |
|                                           | <b>3e</b> | C5''     | 88.6  | 86.8    |
|                                           |           | C6''     | 79.8  | 70.9    |
|                                           |           | C7       | 94.5  | 92.9    |

**Table S10:** Thermodynamic parameters for RAF mechanistic pathway of inactivation of  $\text{CH}_2=\text{CHOO}^\bullet$  by investigated compounds ( $\text{kJ mol}^{-1}$ ).

| $\text{CH}_2=\text{CHOO}^\bullet$ | Compound  | Position | Water | Benzene |
|-----------------------------------|-----------|----------|-------|---------|
|                                   | <b>3a</b> | C5''     | 83.4  | 82.8    |
|                                   |           | C6''     | 63.7  | 59.2    |
|                                   |           | C7       | 73.9  | 72.6    |
|                                   | <b>3b</b> | C5''     | 82.8  | 81.7    |
|                                   |           | C6''     | 78.6  | 72.5    |
|                                   |           | C7       | 74.6  | 73.2    |
|                                   | <b>3c</b> | C5''     | 87.8  | 84.8    |
|                                   |           | C6''     | 68.6  | 61.9    |
|                                   |           | C7       | 74.7  | 82.0    |
|                                   | <b>3d</b> | C5''     | 86.0  | 85.0    |
|                                   |           | C6''     | 48.7  | 44.3    |
|                                   |           | C7       | 74.3  | 75.1    |
|                                   | <b>3e</b> | C5''     | 86.6  | 79.7    |
|                                   |           | C6''     | 72.2  | 63.1    |
|                                   |           | C7       | 78.1  | 77.5    |

**Table S11:** Thermodynamic parameters for RAF mechanistic pathway of inactivation of  $\text{ClCH}_2\text{OO}^\bullet$  by investigated compounds ( $\text{kJ mol}^{-1}$ ).

| $\text{ClCH}_2\text{OO}^\bullet$ | Compound  | Position | Water | Benzene |
|----------------------------------|-----------|----------|-------|---------|
|                                  | <b>3a</b> | C5''     | 86.9  | 81.0    |
|                                  |           | C6''     | 66.4  | 67.1    |
|                                  |           | C7       | 56.7  | 60.7    |
|                                  | <b>3b</b> | C5''     | 86.4  | 76.6    |
|                                  |           | C6''     | 82.8  | 82.4    |
|                                  |           | C7       | 61.5  | 56.0    |
|                                  | <b>3c</b> | C5''     | 95.5  | 92.5    |
|                                  |           | C6''     | 70.2  | 60.1    |
|                                  |           | C7       | 67.7  | 72.6    |
|                                  | <b>3d</b> | C5''     | 92.7  | 81.8    |
|                                  |           | C6''     | 57.0  | 47.8    |
|                                  |           | C7       | 61.1  | 67.8    |
|                                  | <b>3e</b> | C5''     | 88.8  | 85.4    |
|                                  |           | C6''     | 78.0  | 64.0    |
|                                  |           | C7       | 74.1  | 63.4    |



**Table S12:** Thermodynamic parameters for RAF mechanistic pathway of inactivation of  $\text{Cl}_2\text{CHOO}^\bullet$  by investigated compounds ( $\text{kJ mol}^{-1}$ ).

| $\text{Cl}_2\text{CHOO}^\bullet$ | Compound  | Position | Water | Benzene |
|----------------------------------|-----------|----------|-------|---------|
|                                  | <b>3a</b> | C5''     | 64.8  | 55.5    |
|                                  |           | C6''     | 45.9  | 42.0    |
|                                  |           | C7       | 64.3  | 61.1    |
|                                  | <b>3b</b> | C5''     | 54.0  | 60.7    |
|                                  |           | C6''     | 65.5  | 60.6    |
|                                  |           | C7       | 63.4  | 62.7    |
|                                  | <b>3c</b> | C5''     | 62.8  | 63.5    |
|                                  |           | C6''     | 48.7  | 43.4    |
|                                  |           | C7       | 69.3  | 60.2    |
|                                  | <b>3d</b> | C5''     | 63.7  | 69.8    |
|                                  |           | C6''     | 30.2  | 24.2    |
|                                  |           | C7       | 65.6  | 57.2    |
|                                  | <b>3e</b> | C5''     | 68.1  | 67.2    |
|                                  |           | C6''     | 55.7  | 51.3    |
|                                  |           | C7       | 71.0  | 65.2    |

**Table S13:** Thermodynamic parameters for RAF mechanistic pathway of inactivation of  $\text{Cl}_3\text{COO}^\bullet$  by investigated compounds ( $\text{kJ mol}^{-1}$ ).

| $\text{Cl}_3\text{COO}^\bullet$ | Compound  | Position | Water | Benzene |
|---------------------------------|-----------|----------|-------|---------|
|                                 | <b>3a</b> | C5''     | 51.6  | 60.7    |
|                                 |           | C6''     | 35.6  | 33.7    |
|                                 |           | C7       | 49.0  | 49.8    |
|                                 | <b>3b</b> | C5''     | 56.1  | 57.9    |
|                                 |           | C6''     | 51.3  | 56.1    |
|                                 |           | C7       | 55.1  | 55.4    |
|                                 | <b>3c</b> | C5''     | 63.4  | 53.9    |
|                                 |           | C6''     | 43.8  | 40.6    |
|                                 |           | C7       | 54.9  | 59.5    |
|                                 | <b>3d</b> | C5''     | 54.9  | 58.6    |
|                                 |           | C6''     | 22.7  | 19.4    |
|                                 |           | C7       | 48.9  | 61.8    |
|                                 | <b>3e</b> | C5''     | 53.9  | 56.4    |
|                                 |           | C6''     | 40.4  | 43.5    |
|                                 |           | C7       | 55.0  | 54.8    |

**Table S14:** Thermodynamic parameters describing the second step (RAF) of the radical scavenging reaction following the HAT-RAF mechanism in triplet spin state (kJ mol<sup>-1</sup>).

| Compounds |      | Water                                           |                                    |                                  | Benzene                                         |                                    |                                  |
|-----------|------|-------------------------------------------------|------------------------------------|----------------------------------|-------------------------------------------------|------------------------------------|----------------------------------|
| Triplet   |      | (CH <sub>3</sub> ) <sub>3</sub> CO <sup>•</sup> | CH <sub>2</sub> =CHOO <sup>•</sup> | Cl <sub>3</sub> COO <sup>•</sup> | (CH <sub>3</sub> ) <sub>3</sub> CO <sup>•</sup> | CH <sub>2</sub> =CHOO <sup>•</sup> | Cl <sub>3</sub> COO <sup>•</sup> |
| <b>3a</b> | C5'' | 35                                              | 85                                 | 63                               | 32                                              | 84                                 | 63                               |
|           | C6'' | 33                                              | 69                                 | 45                               | 27                                              | 67                                 | 44                               |
|           | C7'' | 39                                              | 85                                 | 64                               | 28                                              | 87                                 | 66                               |
| <b>3b</b> | C5'' | 32                                              | 86                                 | 58                               | 28                                              | 85                                 | 59                               |
|           | C6'' | 46                                              | 89                                 | 61                               | 45                                              | 88                                 | 60                               |
|           | C7'' | 41                                              | 86                                 | 68                               | 38                                              | 85                                 | 67                               |
| <b>3c</b> | C5'' | 28                                              | 71                                 | 39                               | 48                                              | 90                                 | 62                               |
|           | C6'' | 15                                              | 56                                 | 28                               | 33                                              | 77                                 | 48                               |
|           | C7'' | 22                                              | 70                                 | 49                               | 43                                              | 85                                 | 64                               |
| <b>3d</b> | C5'' | 33                                              | 83                                 | 58                               | 34                                              | 84                                 | 61                               |
|           | C6'' | 19                                              | 56                                 | 30                               | 18                                              | 54                                 | 30                               |
|           | C7'' | 43                                              | 87                                 | 60                               | 40                                              | 85                                 | 56                               |
| <b>3e</b> | C5'' | 33                                              | 88                                 | 56                               | 41                                              | 88                                 | 56                               |
|           | C6'' | 32                                              | 73                                 | 55                               | 31                                              | 73                                 | 46                               |
|           | C7'' | 38                                              | 86                                 | 68                               | 47                                              | 82                                 | 68                               |

**Table S15:** Thermodynamic parameters describing the second step (RAF) of the radical scavenging reaction following the HAT-RAF mechanism in singlet spin state (kJ mol<sup>-1</sup>).

| Compounds |      | Water                                           |                                    |                                  | Benzene                                         |                                    |                                  |
|-----------|------|-------------------------------------------------|------------------------------------|----------------------------------|-------------------------------------------------|------------------------------------|----------------------------------|
| Singlet   |      | (CH <sub>3</sub> ) <sub>3</sub> CO <sup>•</sup> | CH <sub>2</sub> =CHOO <sup>•</sup> | Cl <sub>3</sub> COO <sup>•</sup> | (CH <sub>3</sub> ) <sub>3</sub> CO <sup>•</sup> | CH <sub>2</sub> =CHOO <sup>•</sup> | Cl <sub>3</sub> COO <sup>•</sup> |
| <b>3a</b> | C5'' | -114                                            | -54                                | -47                              | -110                                            | -50                                | -70                              |
|           | C6'' | 33                                              | 86                                 | 67                               | 44                                              | 96                                 | 78                               |
|           | C7'' | 28                                              | 104                                | 92                               | 55                                              | 69                                 | 42                               |
| <b>3b</b> | C5'' | -19                                             | 56                                 | 41                               | 20                                              | 97                                 | 80                               |
|           | C6'' | 40                                              | 100                                | 78                               | 62                                              | 114                                | 89                               |
|           | C7'' | 42                                              | 72                                 | 57                               | 11                                              | 85                                 | 42                               |
| <b>3c</b> | C5'' | -33                                             | 40                                 | 31                               | 22                                              | 90                                 | 68                               |
|           | C6'' | -40                                             | 15                                 | -5                               | 10                                              | 63                                 | 48                               |
|           | C7'' | 23                                              | 52                                 | 24                               | 20                                              | 68                                 | 42                               |
| <b>3d</b> | C5'' | -121                                            | -59                                | -74                              | -117                                            | -56                                | -70                              |
|           | C6'' | -44                                             | 8                                  | -12                              | -43                                             | 5                                  | -14                              |
|           | C7'' | 25                                              | 103                                | 88                               | 54                                              | 71                                 | 45                               |
| <b>3e</b> | C5'' | -18                                             | 62                                 | 55                               | 23                                              | 100                                | 86                               |
|           | C6'' | -15                                             | 42                                 | 20                               | 30                                              | 67                                 | 50                               |
|           | C7'' | 40                                              | 70                                 | 41                               | 23                                              | 65                                 | 36                               |

**Table S16:** Gibbs Free Energies of the optimized structures of biradical species (in Hartree)

| Biradical specie |                     | Singlet  |          | Triplet  |          |
|------------------|---------------------|----------|----------|----------|----------|
|                  |                     | Water    | Benzene  | Water    | Benzene  |
| <b>3a</b>        | C2''-O• and C7''-N• | -1178.33 | -1178.32 | -1178.35 | -1178.34 |
| <b>3b</b>        | C4''-O• and C7''-N• | -1178.34 | -1178.33 | -1178.35 | -1178.35 |
| <b>3c</b>        | C4''-O• and C7''-N• | -1292.84 | -1292.83 | -1292.85 | -1292.84 |
| <b>3d</b>        | C2''-O• and C7''-N• | -1253.56 | -1253.55 | -1253.59 | -1253.58 |
|                  | C3''-O• and C7''-N• | -1253.61 | -1253.60 | -1253.59 | -1253.58 |
|                  | C2''-O• and C3''-O• | -1253.61 | -1253.60 | -1253.55 | -1253.55 |
| <b>3e</b>        | C3''-O• and C7''-N• | -1253.57 | -1253.56 | -1253.59 | -1253.58 |
|                  | C4''-O• and C7''-N• | -1253.58 | -1253.57 | -1253.59 | -1253.58 |
|                  | C3''-O• and C4''-O• | -1253.61 | -1253.60 | -1253.55 | -1253.55 |

**Table S17:** Drug-likeness rules and bioavailability score

| SwissADME    |          |        |       |                 |                          |             |                                   |
|--------------|----------|--------|-------|-----------------|--------------------------|-------------|-----------------------------------|
| Compounds    | Lipinski | Ghose  | Veber | Egan            | Muegge                   | Violations  | Bio-availability score            |
| <b>3a</b>    | Yes      | Yes    | Yes   | Yes             | Yes                      | 0           | 0.55                              |
| <b>3b</b>    | Yes      | Yes    | Yes   | Yes             | Yes                      | 0           | 0.55                              |
| <b>3c</b>    | Yes      | Yes    | Yes   | Yes             | Yes                      | 0           | 0.55                              |
| <b>3d</b>    | Yes      | Yes    | Yes   | Yes             | Yes                      | 0           | 0.55                              |
| <b>3e</b>    | Yes      | Yes    | Yes   | Yes             | Yes                      | 0           | 0.55                              |
| ADMET Lab2.0 |          |        |       |                 |                          |             |                                   |
| Compounds    | Lipinski | Pfizer | GSK   | Golden triangle | Natural product-likeness | QED         | Synthetic accesibility (SA)Score* |
| <b>3a</b>    | Yes      | Yes    | Yes   | Yes             | Yes                      | Too complex | 2.339                             |
| <b>3b</b>    | Yes      | Yes    | Yes   | Yes             | Yes                      | Too complex | 2.304                             |
| <b>3c</b>    | Yes      | Yes    | Yes   | Yes             | Yes                      | Too complex | 2.379                             |
| <b>3d</b>    | Yes      | Yes    | Yes   | Yes             | Yes                      | Attractive  | 2.495                             |
| <b>3e</b>    | Yes      | Yes    | Yes   | Yes             | Yes                      | Attractive  | 2.445                             |

\*Compounds with the SA score <6 are considered easy to synthesise

**Table S18:** Predicted pharmacokinetic parameters of investigated compounds by ADMET Lab 2.0 server.

| Compound  | HIA (GI) | BBB | LogKp (cm/s) | P-gp substrate | CYP1A2 inhibitor | CYP2C19 inhibitor | CYP2C9 inhibitor | CYP2D6 inhibitor | CYP3A4 inhibitor |
|-----------|----------|-----|--------------|----------------|------------------|-------------------|------------------|------------------|------------------|
| <b>3a</b> | >30%     | No  | -5.17        | No             | Yes              | No                | Yes              | No               | No               |
| <b>3b</b> | >30%     | No  | -5.06        | No             | Yes              | No                | Yes              | No               | No               |
| <b>3c</b> | >30%     | No  | -5.20        | No             | Yes              | No                | Yes              | No               | Yes              |
| <b>3d</b> | >30%     | No  | -5.65        | No             | Yes              | No                | Yes              | No               | Yes              |
| <b>3e</b> | >30%     | No  | -5.57        | No             | Yes              | No                | No               | No               | Yes              |

**Table S19:** HOMO orbital energies of investigated biradical species in triplet and singlet spin states.

| Compound  | Positions                                   | HOMO       |          |
|-----------|---------------------------------------------|------------|----------|
|           |                                             | Spin state |          |
|           |                                             | Singlet    | Triplet  |
| <b>3a</b> | C2''-O <sup>•</sup> and C7''-N <sup>•</sup> | -0.28378   | -0.26117 |
| <b>3b</b> | C4''-O <sup>•</sup> and C7''-N <sup>•</sup> | -0.28115   | -0.26775 |
| <b>3c</b> | C4''-O <sup>•</sup> and C7''-N <sup>•</sup> | -0.26872   | -0.26413 |
|           | C2''-O <sup>•</sup> and C7''-N <sup>•</sup> | -0.2778    | -0.25316 |
| <b>3d</b> | C3''-O <sup>•</sup> and C7''-N <sup>•</sup> | -0.27959   | -0.28172 |
|           | C2''-O <sup>•</sup> and C3''-O <sup>•</sup> | -0.23737   | -0.3041  |
| <b>3e</b> | C3''-O <sup>•</sup> and C7''-N <sup>•</sup> | -0.27645   | -0.26053 |
|           | C4''-O <sup>•</sup> and C7''-N <sup>•</sup> | -0.27335   | -0.26439 |
|           | C3''-O <sup>•</sup> and C4''-O <sup>•</sup> | -0.23623   | -0.30339 |

**Table S20:** HAT-RC mechanism of radical scavenging activity for compounds **3a-3e** (kJ mol<sup>-1</sup>).

| Compound  | Water                                           |                                    |                                  | Benzene                                         |                                    |                                  |
|-----------|-------------------------------------------------|------------------------------------|----------------------------------|-------------------------------------------------|------------------------------------|----------------------------------|
|           | (CH <sub>3</sub> ) <sub>3</sub> CO <sup>•</sup> | CH <sub>2</sub> =CHOO <sup>•</sup> | Cl <sub>3</sub> COO <sup>•</sup> | (CH <sub>3</sub> ) <sub>3</sub> CO <sup>•</sup> | CH <sub>2</sub> =CHOO <sup>•</sup> | Cl <sub>3</sub> COO <sup>•</sup> |
| <b>3a</b> | -81                                             | -30                                | -53                              | -83                                             | -33                                | -54                              |
| <b>3b</b> | -86                                             | -39                                | -63                              | -88                                             | -35                                | -61                              |
| <b>3c</b> | -83                                             | -29                                | -58                              | -87                                             | -34                                | -61                              |
| <b>3d</b> | -79                                             | -27                                | -53                              | -81                                             | -28                                | -54                              |
| <b>3e</b> | -84                                             | -33                                | -64                              | -86                                             | -35                                | -67                              |

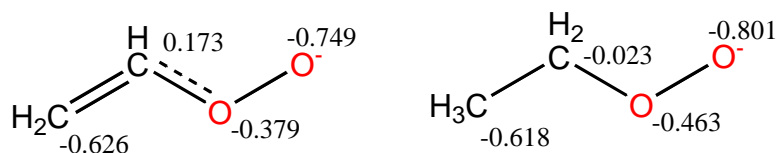

**Figure S1:** NBO charge distribution of  $\text{CH}_2=\text{CHOO}^\bullet$  (left) and  $\text{CH}_3\text{CH}_2\text{OO}^\bullet$  (right)

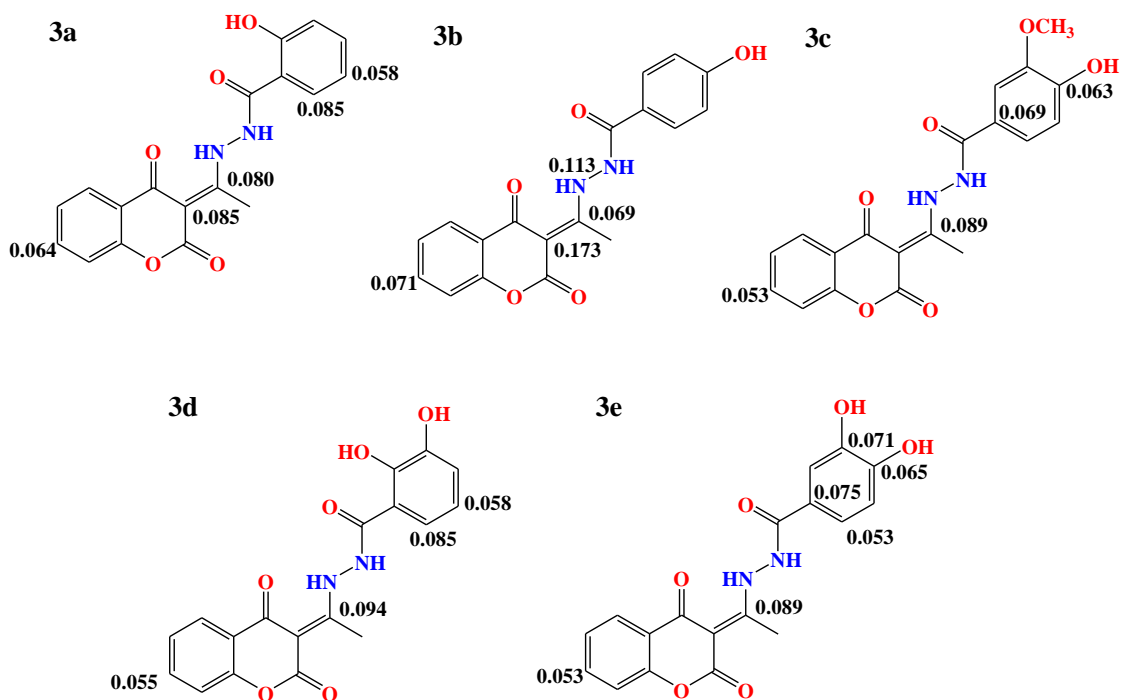

**Figure S2:** Fukui index values for investigated compounds with values higher than 0.05 presented

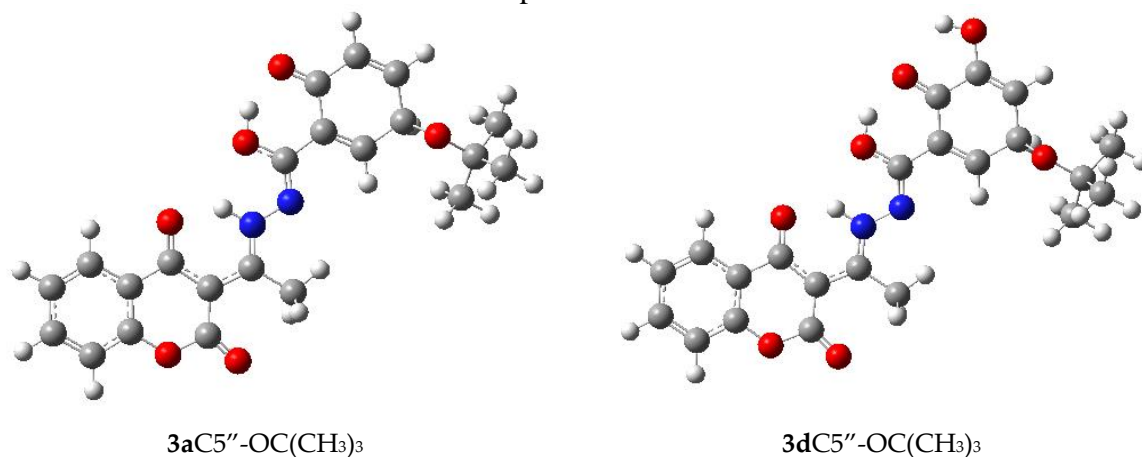

**Figure S3:** Optimised structures of the compounds stabilised by hydrogen transfer from C2''-OH to C7''=O

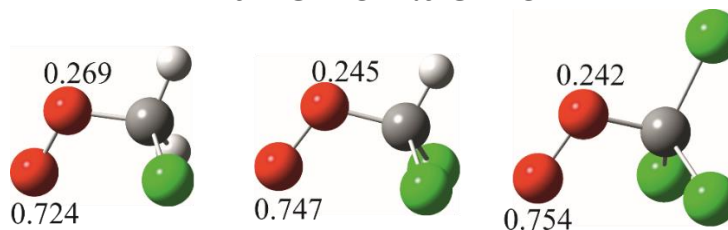

**Figure S4.** NBO spin distribution on the oxygen atoms of chlorinated methyl radicals

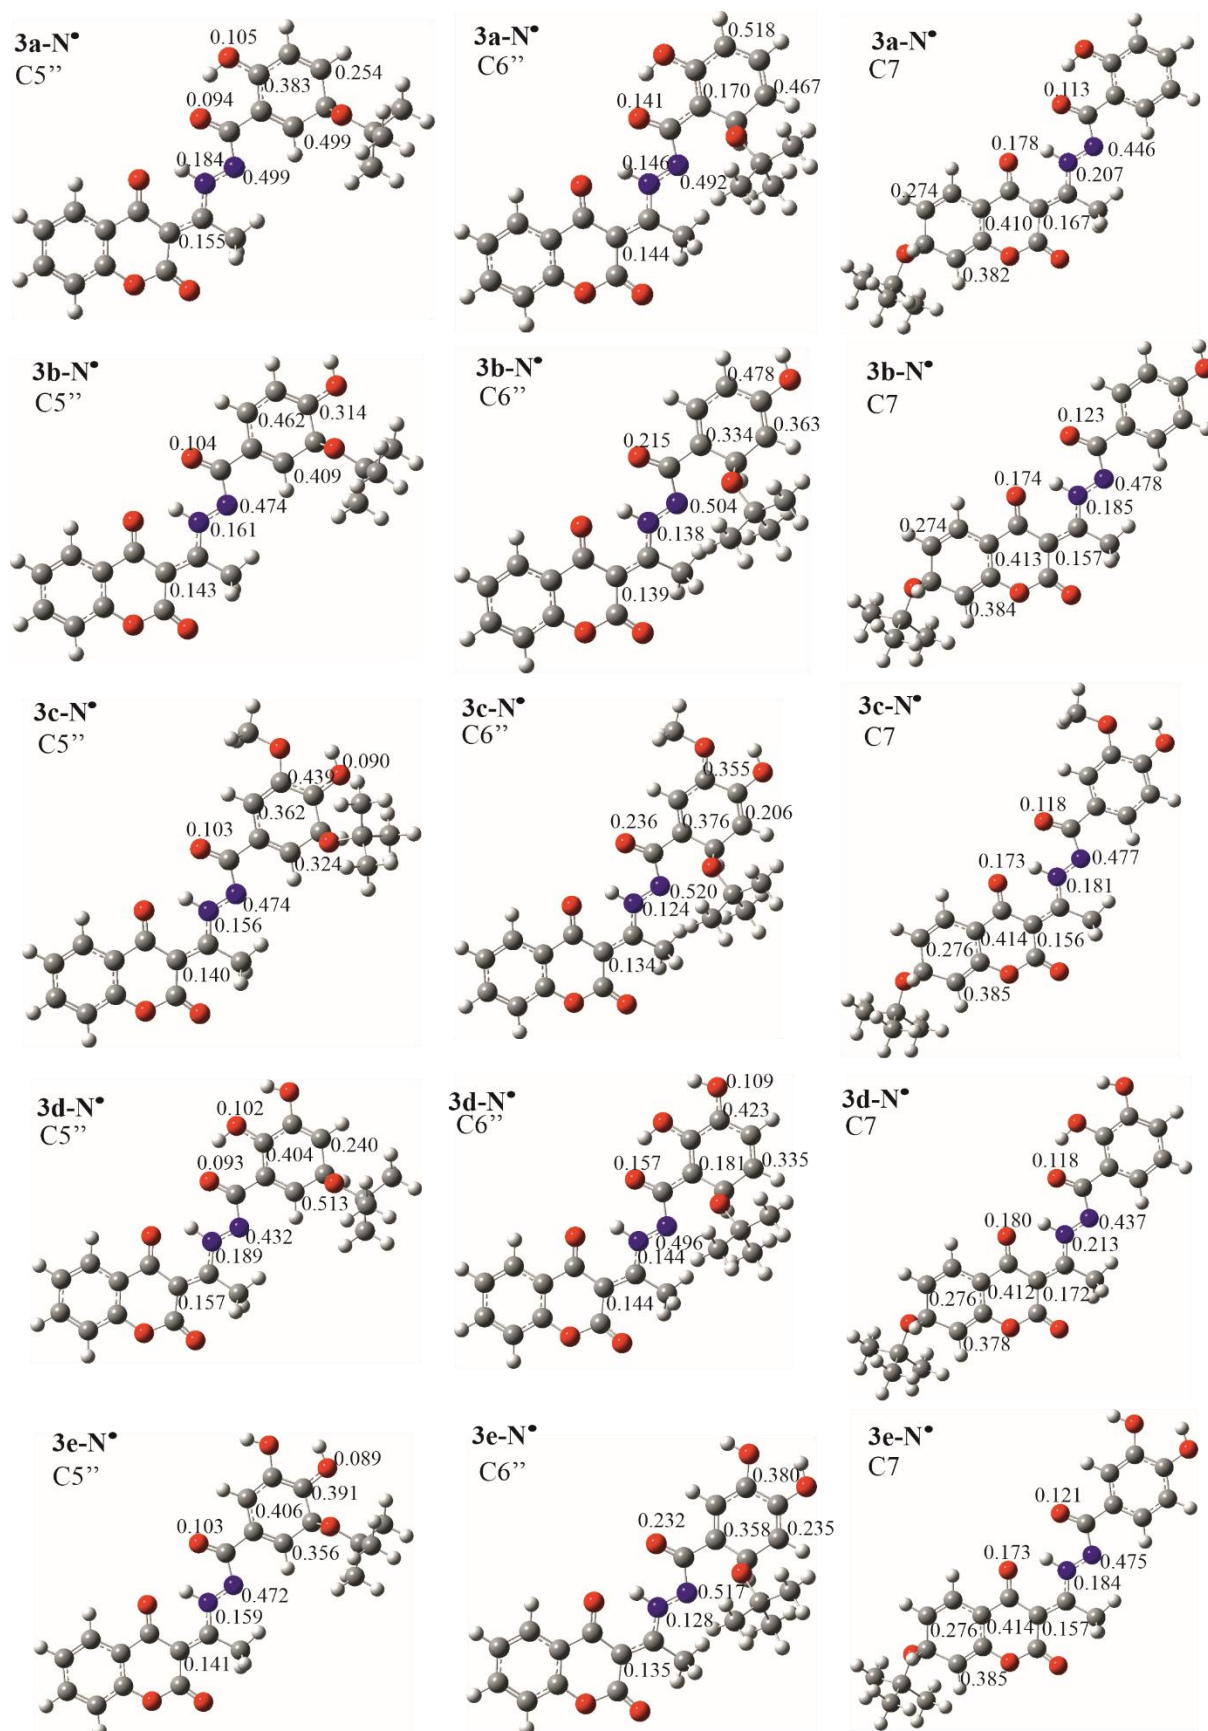

**Figure S5.** NBO spin distribution for adducts obtained in HAT-RAF mechanism with  $(\text{CH}_3)_3\text{CO}^\bullet$
